1

## 2 **A nanopore based chromosome-level assembly representing** 3 **Atlantic cod from the Celtic Sea.**

4

5 Tina Graceline Kirubakaran<sup>1</sup>, Øivind Andersen<sup>1,2</sup>, Michel Moser<sup>1</sup>, Mariann  
6 Arnyasi<sup>1</sup>, Philip McGinnity<sup>3</sup>, Sigbjørn Lien<sup>1</sup>, Matthew Kent<sup>1</sup>.

7

8

9 <sup>1</sup>Centre for Integrative Genetics and Department of Animal and Aquacultural  
10 Sciences, Faculty of Biosciences, Norwegian University of Life Sciences, Ås,  
11 Norway.

12 <sup>2</sup>Nofima, Ås, Norway.

13 <sup>3</sup>School of Biological, Earth & Environmental Sciences, University College Cork,  
14 Cork, Ireland

15

16

17

18

### 19 **ABSTRACT**

20 Currently available genome assemblies for Atlantic cod (*Gadus morhua*) have  
21 been constructed using DNA from fish belonging to the Northeast Arctic Cod  
22 (NEAC) population; a migratory population feeding in the cold Barents Sea.  
23 These assemblies have been crucial for the development of genetic markers  
24 which have been used to study population differentiation and adaptive evolution  
25 in Atlantic cod, pinpointing four discrete islands of genomic divergence located  
26 on linkage groups 1, 2, 7 and 12. In this paper, we present a high-quality  
27 reference genome from a male Atlantic cod representing a southern population  
28 inhabiting the Celtic sea. Structurally, the genome assembly (gadMor\_Celtic) was  
29 produced from long-read nanopore data and has a combined contig size of 686  
30 Mb with a N50 of 10 Mb. Integrating contigs with genetic linkage mapping  
31 information enabled us to construct 23 chromosome sequences which mapped  
32 with high confidence to the latest NEAC population assembly (gadMor3) and  
33 allowed us to characterize in detail large chromosomal inversions on linkage  
34 groups 1, 2, 7 and 12. In most cases, inversion breakpoints could be located  
35 within single nanopore contigs. Our results suggest the presence of inversions in  
36 Celtic cod on linkage groups 6, 11 and 21, although these remain to be confirmed.  
37 Further, we identified a specific repetitive element that is relatively enriched at  
38 predicted centromeric regions. Our gadMor\_Celtic assembly provides a resource  
39 representing a 'southern' cod population which is complementary to the existing  
40 'northern' population based genome assemblies and represents the first step  
41 towards developing pan-genomic resources for Atlantic cod.

42

43 **Keywords**

44 Atlantic cod, genome assembly, nanopore, chromosomal rearrangements, linkage  
45 map, centromere repeats.

46

47 **Introduction**

48 Atlantic cod (*Gadus morhua*) is a commercially exploited high-fecundity fish with  
49 a wide geographical distribution extending over the North Atlantic Ocean from  
50 the nearly freezing waters in the Arctic to variable high temperatures typical of  
51 the southern extremities of the species' Eastern Atlantic distribution  
52 (Mieszkowska et al. 2009; Righton et al. 2010; Morris et al. 2018). It has been  
53 proposed that increases in water temperatures associated with global warming  
54 will see Atlantic cod spread northwards and occupy larger areas of Barents Sea,  
55 while southern populations will decline and possibly disappear (Drinkwater  
56 2005; Mieszkowska et al. 2009). Characterizing the genomic diversity among fish  
57 populations, and understanding its relationship to phenotypic variation has  
58 become increasingly important in fisheries management and for predicting the  
59 response of various ecotypes to environmental fluctuations, such as climatic  
60 changes (Neat and Righton 2007; Righton et al. 2010). Earlier studies in Atlantic  
61 cod have provided evidence for elevated genomic divergence among populations  
62 mainly in respect of four discrete genomic regions, also referred as supergenes,  
63 located on linkage groups (LGs) 1, 2, 7 and 12 (Bradbury et al. 2010; Bradbury et  
64 al. 2013; Hemmer-Hansen et al. 2013; Karlsen et al. 2013; Berg et al. 2015; Berg  
65 et al. 2016; Kirubakaran et al. 2016; Sodeland et al. 2016; Barney et al. 2017;  
66 Barth et al. 2017; Berg et al. 2017; Barth et al. 2019; Clucas et al. 2019a; Clucas et  
67 al. 2019b; Kess et al. 2019; Puncher et al. 2019). Relationships between these  
68 regions and environmental conditions indicates that the region identified on  
69 LG01 is associated with strong genetic differentiation between migratory and  
70 stationary ecotypes on both sides of the Atlantic Ocean (Hemmer-Hansen et al.  
71 2013; Karlsen et al. 2013; Berg et al. 2016; Kirubakaran et al. 2016; Sinclair-  
72 Waters et al. 2017; Kess et al. 2019). This supergene coincides with a double  
73 inversion that suppresses homologous recombination in heterozygotes and  
74 effectively prevents admixing between co-segregating haplotypes (Kirubakaran  
75 et al. 2016). The genomic islands of divergence on LGs 2, 7 and 12 are also found  
76 on both sides of the Atlantic Ocean and it has been suggested that they are  
77 associated with mean ocean temperatures along the north-south gradient  
78 (Bradbury et al. 2010; Bradbury et al. 2013; Berg et al. 2015; Clucas et al. 2019a).  
79 Genomic divergence in these regions has also been associated with other  
80 environmental factors in studies comparing Baltic and North Sea populations  
81 (Berg *et al.* 2015), as well as oceanic and coastal populations in the North Sea  
82 (Sodeland et al. 2016). Elevated linkage disequilibrium (LD) detected across the  
83 regions on LGs 2, 7, and 12 are likely to have arisen as a result of chromosomal  
84 inversions, but high-resolution sequence data showing this and describing the

85 precise locations, sizes and genomic structure underlying these regions has so  
86 far been lacking.

87

88 Most fish genome sequences have been built from short-read Illumina data,  
89 which is a computationally challenging and error prone process especially when  
90 the genomes contain extensive repetitive regions. Long-read sequencing  
91 technologies provide the means to directly read through repetitive elements and  
92 thereby potentially produce much more complete *de novo* assemblies. The  
93 recently released gadMor3 assembly (NCBI accession ID: GCF\_902167405.1) was  
94 developed based on long-read sequence data produced from a NEAC fish and  
95 represent a significant improvement over previous gadMor1 and gadMor2  
96 assemblies generated from the same northern population (Star et al. 2011;  
97 Torresen et al. 2017). In this paper, we used long-read nanopore data to  
98 construct a reference genome assembly for a male Atlantic cod from the  
99 southern population of the Celtic Sea and integrated the assembly with linkage  
100 data to build high-quality chromosomes sequences. The genome sequence was  
101 utilized to detect a potential centromeric repeat sequence differentiating  
102 chromosomal morphology and to characterise with high precision the  
103 chromosomal rearrangements underlying the notable supergenes on LGs 1, 2, 7  
104 and 12.

105

## 106 **Materials and Methods**

### 107 **Sample, DNA extraction and sequencing**

108 DNA from a single, male cod (45cm, 1009gm) fished in the Celtic Sea in January  
109 (50° 42.16N 07° 53.27W, 110m depth) was extracted from frozen blood using  
110 the Nanobind CBB Big DNA kit from Circulomics and sequenced using a  
111 PromethION instrument from Oxford Nanopore Technology (ONT). Two  
112 sequencing libraries were generated following the ligation protocol (SQK-  
113 LSK109, ONT), one using DNA fragments >20kb, size selected using a BUF7510  
114 High pass cassette run on a Blue Pippin (Sage Scientific), and another where no  
115 size selection was performed. Both libraries were split in two and each half  
116 sequenced successively on the same flow-cell (type R9.4.1) after nuclease  
117 flushing according to the Oxford Nanopore protocol (version:  
118 NFL\_9076\_v109\_revF\_08Oct2018). Combined data yields after quality filtering  
119 were 11.2 and 35.5 billion bases for size selected and non-size selected  
120 respectively, with median read lengths being 23.3 kb and 4.5 kb. Together this  
121 represents approximately 70X long-read genome coverage assuming an Atlantic  
122 cod genome size of 670 Mb (as is estimated for gadMor3). Short read data (2 x  
123 250bp) was generated from non-size selected DNA using an Illumina MiSeq  
124 instrument. Libraries were prepared using a TruSeq DNA PCR free kit (Illumina)  
125 and sequenced in multiple runs to generate 71M read pairs, equalling  
126 approximately 35.5Gbp or 50X genome coverage.

127

## 128 **Construction of the gadMor\_Celtic assembly**

129 The raw nanopore reads (n=2,868,527) was base-called using Guppy-  
130 2.2.3 (<https://community.nanoporetech.com>) using flip-flop model. Adapters  
131 were removed from reads using Porechop v0.2.3, 1 (Wick et al. 2018) and  
132 quality-filtered using fastp v.0.19.5.2 (Chen et al. 2018) with mean base quality  
133 greater than 7, trimming the 50bp at the 5' end of the read and removing all  
134 reads less than 4000 bp. Multiple initial assemblies applying various parameters  
135 were produced using wtdgb2 v2.3 (Ruan and Li 2019). The completeness of all  
136 assembled genomes was estimated using BUSCO v3.1.0 (Simao et al. 2015) and  
137 applying the actinopterygii (ray-finned fishes) reference gene data set. Two  
138 genome assemblies with the relative best values for contig N50, total genome  
139 size and BUSCO scores were selected (See File S1) for further quality  
140 assessments.

141  
142 To improve assembly contiguity, contigs showing a sequence overlap of more  
143 than 5000bp and similarity >95% were combined using quickmerge  
144 (Chakraborty et al. 2016). This consensus assembly was error corrected by  
145 performing two successive rounds of processing by Racon v2.3 (Vaser et al.  
146 2017) using only quality filtered nanopore reads. Raw MiSeq reads were quality  
147 filtered using Trimmomatic v0.32, before being used by Pilon v1.23 to further  
148 improve per-base accuracy in the consensus sequence. Completeness of the final  
149 polished contigs was performed as described above using BUSCO.

## 150 151 **Linkage mapping and construction of chromosome sequences**

152 The linkage map was constructed using 9,178 high-quality SNPs (File S2)  
153 genotyped in farmed cod (n=2951) sampled from 88 families of the National cod  
154 breeding program maintained by Nofima in Tromsø, Norway, and from eight  
155 families of the CODBIOBANK at the Institute of Marine Research in Bergen,  
156 Norway. The genotypes were produced on a 12K SNP-array created as a part of  
157 the Cod SNP Consortium (CSC) in Norway and being used in numerous previous  
158 studies (Berg et al. 2015; Sodeland et al. 2016; Barth et al. 2017; Berg et al. 2017;  
159 Sinclair-Waters et al. 2017; Knutsen et al. 2018; Kess et al. 2019). The SNPs on  
160 this array were carefully chosen to tag as many contigs as possible in the  
161 gadMor1 assembly, are thus expected to be well distributed in the genome and  
162 builds a good foundation for anchoring sequences to chromosomes. Linkage  
163 mapping was performed with the Lep-MAP software in a stepwise procedure  
164 (Rastas et al. 2013). First, SNPs were assigned to linkage groups with the  
165 'SeparateChromosomes' command using increasing LOD thresholds until the  
166 observed number of linkage groups corresponded with the expected haploid  
167 chromosome number of 23. Additional SNPs were subsequently added to the  
168 groups with the 'JoinSingles' command at a more relaxed LOD threshold, and  
169 finally SNPs were ordered in each linkage group with the 'OrderMarkers'  
170 command. Numerous iterations were performed to optimise error and

171 recombination parameters. Following this, sequence flanking each marker was  
172 used to precisely position all genetic markers to contigs in the gadMor\_Celtic  
173 assembly using megablast (Altschul et al. 1990), and thereby associate sequence  
174 with linkage groups. This analysis revealed 2 chimeric contigs containing at  
175 markers from each of different linkage groups that were selectively 'broken'  
176 using alignments with the gadMor2 assembly (Torresen et al. 2017). After  
177 breakage of the two contigs, linkage information was used to order, orientate  
178 and concatenate contigs into 23 chromosomes. Finally, SNPs were positioned in  
179 the chromosome sequences using megablast and linkage maps constructed using  
180 a fixed order in Lep-MAP to produce the final linkage maps presented in File S2  
181 and File S3.

182

### 183 **Detection of repetitive elements**

184 RepeatModeler version 1.0.8 (Smit et al. 1996) was used to generate a repeat  
185 library, subsequently RepeatMasker version 4.0.5 (Smit et al. 1996) was run on  
186 the finished gadMor\_Celtic with default options to identify the repeats in the  
187 genome assembly. For the purposes of detecting putative centromeric  
188 sequences, tandem repeats were identified using TandemRepeat finder (TRF)  
189 version 4.09 (Benson 1999) with the following parameters: matching weight=2,  
190 mismatching penalty=7, indel penalty=7, match probability=80, indel  
191 probability=10, minimum score to report=30 and maximum period size to  
192 report=500. The output was processed using custom perl and unix scripts to  
193 identify repeats specifically containing more than 60% AT, longer than 80 bp,  
194 and present in all 23 LGs.

195

### 196 **Gene annotation**

197 Data from various public sources was used to build gene models including (i) 3M  
198 transcriptome reads generated using GS-FLX 454 technology and hosted at  
199 NCBI's SRA (<https://www.ncbi.nlm.nih.gov/sra/?term=SRP013269>), (ii) >250 K  
200 ESTs hosted by NCBI (<https://www.ncbi.nlm.nih.gov/nucest>) (iii) 4.4 M paired-  
201 end mRNA MiSeq sequences from whole NEAC larvae at 12 and 35 dph  
202 (<https://www.ebi.ac.uk/ena>, PRJEB25591) and (iv) 362 M Illumina reads from 1  
203 and 7 dph (<https://www.ebi.ac.uk/ena>, PRJEB25591). To enable model building,  
204 MiSeq reads and short illumina reads were mapped to the gadMor\_Celtic  
205 assembly using STAR v2.3.1z (Dobin et al. 2013), while 454 transcriptome reads  
206 were mapped using gmap v2014-07-28 (Wu and Watanabe 2005) with '-no-  
207 chimeras' parameter in addition to default parameters. stringtie v1.3.3 (Pertea  
208 et al. 2015) was used to assemble the reads into transcript models. Transcript  
209 models were merged using stringtie merge (Pertea et al. 2015). Gene models  
210 were tested by performing (i) open reading frame (ORF) prediction using  
211 TransDecoder (Haas et al. 2013) using both pfamA and pfamB databases for  
212 homology searches and a minimum length of 30 amino acids for ORFs without  
213 pfam support, and (ii) BLASTP analysis (evaluate <1e-10) for all predicted proteins

214 against zebrafish (*Danio rerio*) (v9.75) and three-spined stickleback  
215 (*Gasterosteus aculeatus*) (BROADS1.75) annotations from Ensembl. Only gene  
216 models with support from at least one of these homology searches were  
217 retained. Functional annotation of the predicted transcripts was done using  
218 blastx against the SwissProt database. Results from TransDecoder and homology  
219 support filtering of putative protein coding loci are shown in File S3.

220

## 221 **Data availability**

222 The datasets generated and used during the current study, gadMor\_Celtic, repeat  
223 library and all supplementary files are stored at figshare:  
224 doi.org/10.6084/m9.figshare.10252919. The raw nanopore reads used to  
225 generate gadMor\_Celtic are available at European Nucleotide Archive under  
226 accession ID PRJEB35290.

227

## 228 **Results and Discussion**

### 229 *Genome assembly*

230 The current methodological convention in population genomics is to build  
231 genomic tools and interpret results based on the information acquired from one  
232 arbitrarily sampled individuals' reference genome, which is used as a default to  
233 represent the whole species. Accordingly, genome assemblies for Atlantic cod  
234 have been generated from NEAC, which is a migratory population feeding in the  
235 cold waters of Barents Sea. However, with the advent of new, cheaper  
236 sequencing platforms and long-read technology it is now possible to develop  
237 multiple reference genome sequences representing a broader species diversity.  
238 As a contrast to NEAC, we decided here to generate a high-quality reference  
239 genome from a male Atlantic cod captured in the Celtic sea, a region representing  
240 the southernmost extreme of the Eastern Atlantic distribution (Mieszkowska et  
241 al. 2009; Neat et al. 2014) and where cod are likely to be experiencing  
242 suboptimal summer temperatures (Neat and Righton 2007). Our gadMor\_Celtic  
243 assembly was built in a stepwise process involving: (i) the testing of multiple  
244 combinations of assembly parameters to generate initial assemblies using  
245 wtdgb2 (Ruan and Li 2019); (ii) the merging of contigs from selected initial  
246 assemblies into a primary assembly using quickmerge (Chakraborty et al. 2016);  
247 (iii) performing multiple rounds of base error correction using Racon (Vaser et  
248 al. 2017) and Pilon (Walker et al. 2014); finally (iv) the anchoring and  
249 orientation of polished contigs into linkage groups.

250

251 The two 'best' initial assemblies (see Materials and Methods for details), were  
252 similar with regards to their total size (bp), number of contigs, and contig N50  
253 (see Table 1), and their Benchmarking Universal Single-Copy Orthologs (BUSCO)  
254 scores of 20-40% indicating a poor content of identifiable reference genes. This  
255 last observation likely reflects the fact that they were constructed from nanopore  
256 reads alone (which suffer from relatively high rates of substitution and deletion

257 errors; e.g. 13% and 5% respectively (Bowden et al. 2019)) and that the  
258 assemblies generated were not corrected with higher quality reads such as those  
259 that can be generated from Illumina sequencing (Jain et al. 2018). To improve  
260 assembly contiguity, contigs showing a sequence overlap of more than 5kb with  
261 >95% similarities were combined using quickmerge. This increased the contig  
262 N50 from 6 to 10.4Mb and concurrently reduced the number of contigs.  
263 Thereafter, two rounds of error correction were performed. First round used  
264 Racon to generate consensus sequences using the 70X nanopore data alone and  
265 resulted in a BUSCO score of 66.5%. Second round used Pilon and 50X coverage  
266 high-quality Illumina data (16.5Mb paired-end 250 bp reads) and saw the BUSCO  
267 genome completeness score increase to 94.2% which is comparable to other  
268 high quality fish genomes (e.g. (Chen et al. 2019; Kadobianskyi et al. 2019). The  
269 resulting gadMor\_Celtic assembly is composed of 1,253 contigs (contig N50=10.5  
270 Mb, average contig length 0.55 Mb) and includes 686 Mb of sequence.  
271

|                        | <b>Total size<br/>(bp)</b> | <b>Total number<br/>of contigs</b> | <b>Contig N50<br/>(bp)</b> | <b>BUSCO score<br/>(%)</b> |
|------------------------|----------------------------|------------------------------------|----------------------------|----------------------------|
| Wtdgb2 assembly 1      | 668,357,526                | 1600                               | 6,012,173                  | 23.2                       |
| Wtdgb2 assembly 2      | 670,278,278                | 1666                               | 6,004,590                  | 42.4                       |
| Quickmerge contigs     | 677,547,349                | 1253                               | 10,448,158                 | Not done                   |
| Racon polishing        | 683,672,734                | 1253                               | 10,518,163                 | 66.5                       |
| <b>Pilon polishing</b> | <b>685,982,295</b>         | <b>1253</b>                        | <b>10,559,872</b>          | <b>94.2</b>                |

272  
273 **Table 1. Assembly statistics.** Metrics describing genome statistics of the initial assemblies, the  
274 quickmerge assembly, and the final gadMor\_Celtic assembly after polishing with nanopore (Racon)  
275 and Illumina (Pilon) data.  
276

277 High-quality linkage maps of densely spaced markers provide the means to  
278 reliably anchor genomic fragments (contigs and scaffolds) to chromosomes. If  
279 constructed in a large pedigree, and with an adequate number of markers, it may  
280 also serve as the backbone for ordering, orienting and concatenating the  
281 fragments into chromosome sequences. However, the ability to order and  
282 orientate fragments is constrained by the frequency and location of  
283 recombination events and thus is limited by the resolution of the map. In this  
284 study we used a genetic map consisting of 9,178 SNPs (File S2), constructed in a  
285 large pedigree of 2,951 individuals to order and orientate 149 contigs (totalling  
286 643.4 Mb; 93% of assembly) into 23 chromosome sequences. The average  
287 number of SNPs per contig was 56.1, with only 12 contigs containing fewer than  
288 five SNPs. The high contiguity of the gadMor\_Celtic assembly is evidenced by the  
289 fact that for one linkage group (LG14), the entire genetic map was correctly  
290 captured by a single contig of more than 30 Mb. The total length of the female  
291 linkage map (1,662.7 cM) was approximately 1.3 times larger than the male map  
292 (1,262.3 cM). The linkage maps were constructed using genotypes from  
293 pedigreed samples belonging to families where the large inversions on LGs 1, 2, 7

294 and 12 were segregating, this led to pronounced gaps in the linkage maps at the  
295 borders of these inversions (see File S4).

296

### 297 *Chromosomal inversions*

298 The detection of extended blocks of LD between SNPs has been used in several  
299 studies to define the regions of genetic differentiation on Atlantic cod LGs 1, 2, 7  
300 and 12 (Bradbury et al. 2010; Berg et al. 2015; Sodeland et al. 2016; Barney et al.  
301 2017). Large chromosomal inversions have been hypothesized for all four  
302 regions but only documented for LG01 (Kirubakaran *et al.* 2016). While regions  
303 of extended LD are symptomatic of large polymorphic inversions, no studies  
304 have directly compared reference genomes from different cod ecotypes to define  
305 and confirm the underlying mechanism, or to locate the genomic regions  
306 containing the inversion breakpoints or to define the exact complement of genes  
307 they contain. We aligned the recently released gadMor3 assembly (NCBI  
308 accession ID: GCF\_902167405.1) constructed from a NEAC individual to our  
309 gadMor\_Celtic assembly using LASTZ (Harris 2007). The gadMor3 assembly was  
310 generated following a comprehensive sequencing effort combining long-read  
311 sequence data from Pacific BioSciences with various datasets for scaffolding and  
312 polishing, and resulted in 1,442 contigs (contig N50=1.015 Mb). Despite being an  
313 order of magnitude smaller than our gadMor\_Celtic contigs, the gadMor3  
314 scaffolds nevertheless mapped with a high confidence to the assembly and  
315 showed that the two assemblies display alternative configurations of inversions  
316 for the supergenes on LGs 1, 2, 7 and 12. In most cases, the inversion breakpoints  
317 could be described at high resolution because they locate within single nanopore  
318 contigs. Exceptions to this were the third breakpoint of LG01 and second  
319 breakpoint on LG07 which falls between two gadMor\_Celtic contigs (Figure 1).

320

321

322

323

324



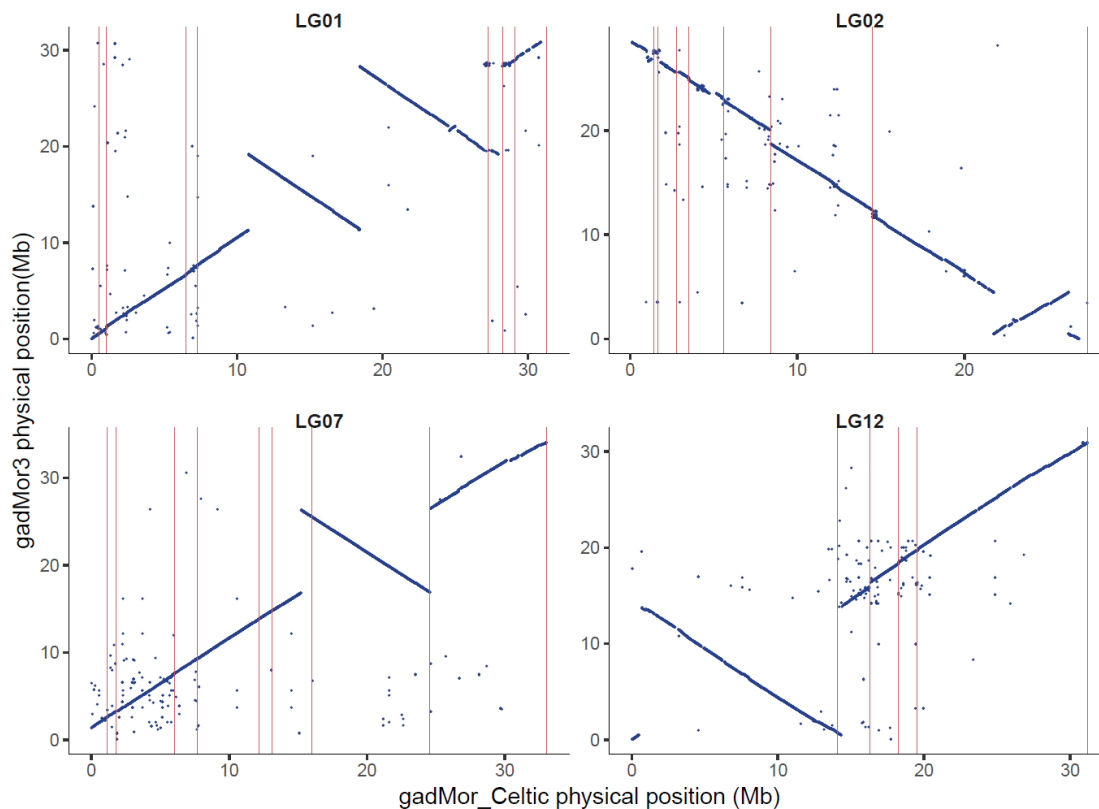

325  
 326 **Figure 1.** Alignment of *gadMor\_Celtic* (x-axis) and *gadMor3* (y-axis) chromosome  
 327 sequences for linkage groups 1, 2, 7 and 12. Vertical lines (pink) demarcate  
 328 boundaries of *gadMor\_Celtic* contigs.

329  
 330 A perfect characterization of inversion breakpoints at the sequence level using  
 331 the *gadMor3* and *gadMor\_Celtic* assemblies would require that contigs from both  
 332 assemblies span the breakpoints and that sequences at the breakpoints would  
 333 align perfectly with high confidence. As contig structure is not available in the  
 334 *gadMor3* assembly, and genome alignments to some extent were confounded by  
 335 repetitive sequences, we believe it is appropriate to present the inversion  
 336 breakpoints as regions, or putative intervals (see Table 2).

337

| Linkage Group | Putative interval containing breakpoint |            | Size (bp) | Inversion size (Mb) |
|---------------|-----------------------------------------|------------|-----------|---------------------|
|               | Start                                   | End        |           |                     |
| LG01          | 10,782,691                              | 10,787,755 | 5,064     | 17.45               |
|               | 18,422,802                              | 18,425,099 | 2,297     |                     |
|               | 28,225,372                              | 28,228,130 | 2,758     |                     |
| LG02          | 21,733,338                              | 21,733,998 | 660       | 4.51                |
|               | 26,233,253                              | 26,238,098 | 4,840     |                     |
| LG07          | 15,208,043                              | 15,210,043 | 2,000     | 9.37                |
|               | 24,574,346                              | 24,575,510 | 1,164     |                     |
| LG12          | 493,527                                 | 635,659    | 142,132   | 13.88               |
|               | 14,330,965                              | 14,376,973 | 46,008    |                     |

338

339 **Table 2.** Genomic regions likely containing the inversion breakpoints. A  
 340 pairwise comparison between *gadMor\_Celtic* and *gadMor3* reveals the interval

341 *(described as a start and stop coordinates relative to the gadMor\_Celtic assembly)*  
342 *for each inversion breakpoint LGs 1, 2, 7, and 12.*

343

344 In the gadMor\_Celtic assembly the double inversion on LG01 spans a total  
345 interval of 17.45 Mb which is slightly larger than our previous estimate of 17.37  
346 Mb (Kirubakaran et al., 2016). Our ability to detect inversions when comparing  
347 gadMor3 to the NEAC reference suggests that Celtic cod possess the stationary  
348 (as opposed to migratory) ecotype chromosome configuration. An earlier survey  
349 of Celtic cod (Neat et al. 2014) showed that while a portion of the population  
350 migrate horizontally (from the Celtic sea to the Western English channel) they do  
351 not undertake the scale of vertical migration that have been reported for NEAC  
352 fish, which have been found at depths of up to 500m (Godo and Michalsen 2000).  
353 Instead Celtic cod are typically located at depths of about 100 meters, which is  
354 similar to the depth distribution of the stationary populations found around the  
355 Norwegian coast (Hobson et al. 2007).

356

357 The inversions on LGs 2, 7 and 12 span 4.51, 9.37 and 13.88 Mb, respectively.  
358 These sizes are in relatively close agreement to earlier estimations of 5.0, 9.5,  
359 and 13 Mb, which were calculated from LD analyses and detection of regions of  
360 elevated divergence between populations (Sodeland et al. 2016). In their  
361 analysis, Sodeland *et al.* (2016) used the highly fragmented gadMor1 assembly  
362 (Star et al. 2011) and a relatively sparse set of 9,187 SNPs to define the regions,  
363 both factors that may explain the physical difference between estimates. A more  
364 recent study investigated cod populations from the Northwest Atlantic and  
365 measured LD amongst almost 3.4M SNPs detected from resequencing data, the  
366 LGs 2, 7 and 12 inversions were estimated to be 5.6, 9.3, and 11.6 Mb  
367 respectively (Barney et al. 2017). While not identical, these regions and sizes  
368 detected in fish from both sides of the Atlantic are remarkably consistent,  
369 supporting the hypothesis that these cod have a common ancestral origin (Berg  
370 et al. 2017; Sinclair-Waters et al. 2017).

371

372 Our analyses suggest the presence of putative inversions in gadMor\_Celtic on LGs  
373 6, 11 and 21 (see Figure 2) which, to the best of our knowledge, have not been  
374 reported elsewhere. The inversions are smaller (1.4, 0.6, 1.78 Mb, respectively)  
375 than the rearrangements comprising the supergenes on LGs 1, 2, 7 and 12.

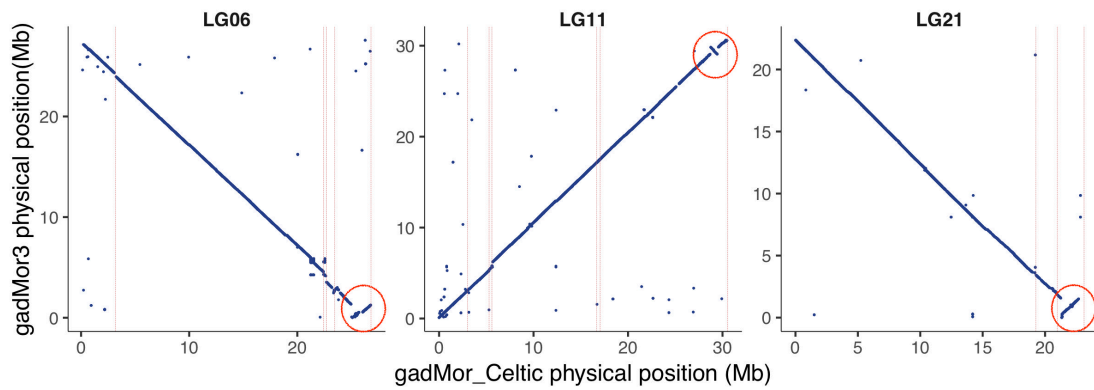

376

377

**Figure 2.** Putative inversions detected on LGs 6, 11 and 21.

378

### 379 *Annotation of gene content and repetitive elements*

380 There is a growing body of evidence that chromosomal inversions in fishes can  
381 capture multiple adaptive alleles and therefore act as supergenes (for example  
382 (Jones et al. 2012; Pearse et al. 2018; Pettersson et al. 2019). Defining the gene  
383 content and identifying genetic variation within these chromosomal inversions is  
384 an important means for investigating how changes in genome organization may  
385 lead to phenotypic and adaptive divergence. Utilizing available transcript data  
386 we predict 14,292 genome wide gene models with 735, 236, 343 and 452 gene  
387 models predicted in inversions on LGs 1, 2, 7 and 12 respectively (File S5). In the  
388 context of a north versus south contrast (i.e. NEAC vs Celtic) the polymorphic  
389 haemoglobin *Hb $\beta$ 1* gene deserves special mention since there is good evidence  
390 for temperature-associated adaptation (Frydenberg et al. 1965; Andersen 2012).  
391 Although the haemoglobin gene maps to LG02 it is, however, located outside the  
392 inversion (approximately 3 Mb upstream) which raises questions about the  
393 mechanism maintaining its association with temperature. To document repeats  
394 in gadMor\_Celtic we created a repeat library using RepeatModeler (Smit et al.  
395 1996) which, when used with RepeatMasker (Smit et al. 1996) saw almost one  
396 third of the genome (32.26%) classified as repetitive.

397

### 398 *Potential centromere structure and organization*

399 Centromeres contribute to the physical linking of sister chromatids during  
400 meiosis and their location within a dyad is important for defining the  
401 chromosomal morphology (or chromosome classification) used in karyotyping  
402 studies (e.g. metacentric, acrocentric, etc). Centromeres can be relatively large  
403 and usually contain a lot of repetitive, but poorly conserved sequences (Melters  
404 et al. 2013). Searching for known centromere repeats (Melters et al. 2013) in  
405 gadMor\_Celtic assembly failed to reveal any convincing hits. We therefore used  
406 TandemRepeat finder (TRF) (Benson 1999) to scan the assembly for sequences  
407 meeting characteristics typical of centromeric repeats; specifically containing  
408 more than 60% AT, longer than 80 bp, and present in all 23 LGs. We detected a  
409 258bp sequence composed of two identical and similarly oriented 88bp repeats

410 (one at each end) separated by an 82bp intervening sequence (see File S6 for  
411 details). This expected centromeric repeat appeared 806 times (with more than  
412 95% identity) across the genome and was found on all LGs. The location of this  
413 repeat was compared to the genetic map profiles for all 23 linkage groups (File  
414 S4). We reasoned that regions of reduced recombination likely contain, or are  
415 close to, the centromere and should therefore coincide with the mapping of the  
416 centromeric repeat sequence. For most linkage groups, there was a convincing  
417 overlap between these two metrics. Most evidently, all four LGs (2, 4, 10 and 12)  
418 showing clear sigmoidal linkage profiles characteristic of a metacentric  
419 chromosome (Ghigliotti et al. 2012), contained expansion of the centromeric  
420 repeat sequence within the region of repressed recombination in the middle of  
421 the linkage group (see Figure 3 for example).  
422

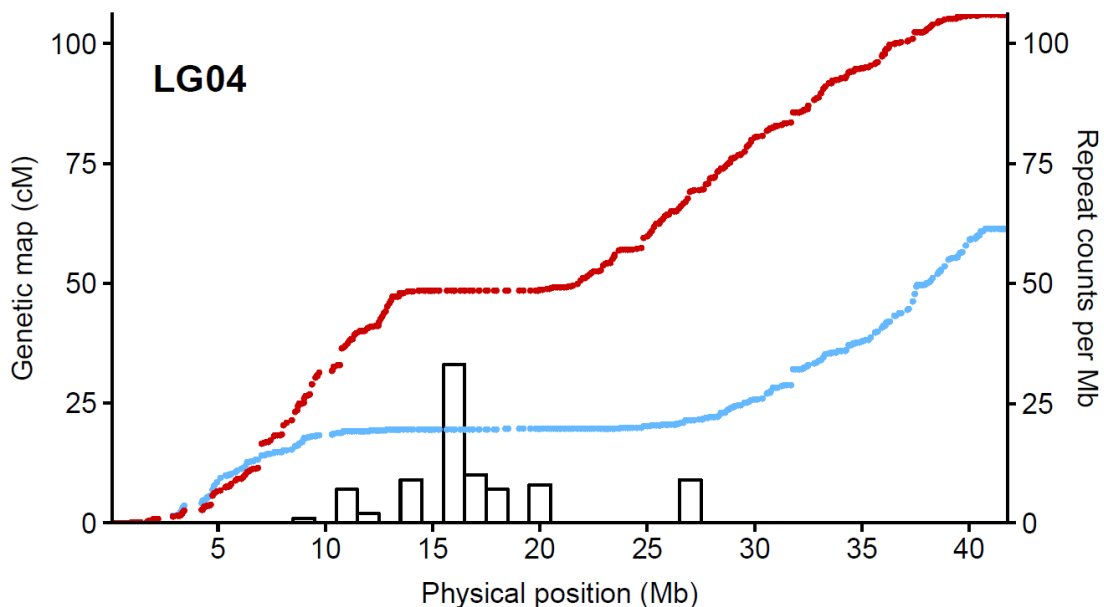

423  
424

425 **Figure 3.** Position of potential centromere related sequence on LG04. Collinearity  
426 between LG04 genetic maps for males (red) and female (blue) and the frequency of  
427 a 258bp tandem repeat structure (histogram) predicted to be related to  
428 centromeres.

429

430 In this paper we used nanopore sequencing to generate a chromosome-level  
431 genome assembly from a male Atlantic cod captured in the Celtic Sea. Cod from  
432 this region experience high, possibly suboptimal summer temperatures, and  
433 consequently this sample represents a contrast to the current genome  
434 assemblies generated from NEAC population sampled from the considerably  
435 colder Barents Sea. By generating this new assembly, and comparing it against  
436 the gadMor3 assembly, we were able to characterize the population specific  
437 chromosomal rearrangements associated with four notable supergenes  
438 displaying pronounced divergence between them. Pairwise comparison of the

439 two genomes also revealed additional putative rearrangements on LGs 6, 11 and  
440 21, which has not been reported before. Identification and mapping of the  
441 centromeric repeat enabled by the new high resolution gadMor\_Celtic assembly,  
442 combined with linkage maps, were used to study chromosomal morphology and  
443 reliably identify four characteristic metacentric chromosomes in Atlantic cod.

444

445

#### 446 **Supplementary Material**

447 File S1: wtdbg2 parameters used to generate the two initial genome assemblies.

448

449 File S2: Linkage map of gadMor\_Celtic: SNPs, position in gadMor\_Celtic, genetic  
450 linkage of male, female in centimorgan (cM) and SNP flank sequence from  
451 gadMor1 (NEAC).

452

453 File S3: Predicted function of open reading frames were found with  
454 TransDecoder and homology search using blastp against zebrafish and  
455 stickleback protein databases.

456

457 File S4: Plots showing collinearity between genetic maps for males (red) and  
458 female (blue) and the frequency of a 258bp tandem repeat structure (histogram)  
459 predicted to be related to centromeres in all 23 chromosomes.

460

461 File S5: This contains the list of genes and its positions in LGs 1, 2, 7 and 12.

462

463 File S6: The putative 258bp centromere repeat sequence.

464

465

#### 466 **Acknowledgements**

467 The authors are grateful to Mr Brendan O'Hea at the Fisheries Ecosystems  
468 Advisory Service for providing the fish samples, and to our colleagues in the Cod  
469 SNP Consortium (CSC; a collaboration between CIGENE, CEES, IMR and Nofima)  
470 from where the genotypes used for the linkage analyses were derived. Funding  
471 for T.G.K. was provided by the Norwegian University of Life Sciences (NMBU).

472

#### 473 **References**

474 Altschul, S.F., W. Gish, W. Miller, E.W. Myers, and D.J. Lipman, 1990 Basic Local  
475 Alignment Search Tool. *Journal of Molecular Biology* 215 (3):403-410.

476 Andersen, O., 2012 Hemoglobin polymorphisms in Atlantic cod - a review of 50  
477 years of study. *Marine Genomics* 8:59-65.

478 Barney, B.T., C. Munkholm, D.R. Walt, and S.R. Palumbi, 2017 Highly localized  
479 divergence within supergenes in Atlantic cod (*Gadus morhua*) within the Gulf  
480 of Maine. *BMC Genomics* 18 (1):271.

- 481 Barth, J.M.I., P.R. Berg, P.R. Jonsson, S. Bonanomi, H. Corell *et al.*, 2017 Genome  
482 architecture enables local adaptation of Atlantic cod despite high connectivity.  
483 *Molecular Ecology* 26 (17):4452-4466.
- 484 Barth, J.M.I., D. Villegas-Rios, C. Freitas, E. Moland, B. Star *et al.*, 2019  
485 Disentangling structural genomic and behavioural barriers in a sea of  
486 connectivity. *Molecular Ecology* 28 (6):1394-1411.
- 487 Benson, G., 1999 Tandem repeats finder: a program to analyze DNA sequences.  
488 *Nucleic Acids Research* 27 (2):573-580.
- 489 Berg, P.R., S. Jentoft, B. Star, K.H. Ring, H. Knutsen *et al.*, 2015 Adaptation to low  
490 salinity promotes genomic divergence in Atlantic cod (*Gadus morhua* L.).  
491 *Genome Biology and Evolution* 7 (6):1644-1663.
- 492 Berg, P.R., B. Star, C. Pampoulie, I.R. Bradbury, P. Bentzen *et al.*, 2017 Trans-  
493 oceanic genomic divergence of Atlantic cod ecotypes is associated with large  
494 inversions. *Heredity* 119 (6):418-428.
- 495 Berg, P.R., B. Star, C. Pampoulie, M. Sodeland, J.M.I. Barth *et al.*, 2016 Three  
496 chromosomal rearrangements promote genomic divergence between  
497 migratory and stationary ecotypes of Atlantic cod. *Scientific Reports* 6.
- 498 Bowden, R., R.W. Davies, A. Heger, A.T. Pagnamenta, M. de Cesare *et al.*, 2019  
499 Sequencing of human genomes with nanopore technology. *Nature*  
500 *Communications* 10.
- 501 Bradbury, I.R., S. Hubert, B. Higgins, T. Borza, S. Bowman *et al.*, 2010 Parallel  
502 adaptive evolution of Atlantic cod on both sides of the Atlantic Ocean in  
503 response to temperature. *Proceedings of the Royal Society B-Biological Sciences*  
504 277 (1701):3725-3734.
- 505 Bradbury, I.R., S. Hubert, B. Higgins, S. Bowman, T. Borza *et al.*, 2013 Genomic  
506 islands of divergence and their consequences for the resolution of spatial  
507 structure in an exploited marine fish. *Evolutionary Applications* 6 (3):450-461.
- 508 Chakraborty, M., J.G. Baldwin-Brown, A.D. Long, and J.J. Emerson, 2016  
509 Contiguous and accurate de novo assembly of metazoan genomes with modest  
510 long read coverage. *Nucleic Acids Research* 44 (19).
- 511 Chen, S., Y. Zhou, Y. Chen, and J. Gu, 2018 fastp: an ultra-fast all-in-one FASTQ  
512 preprocessor. *Bioinformatics* 34 (17):i884-i890.
- 513 Chen, Z.L., Y. Omori, S. Koren, T. Shirokiya, T. Kuroda *et al.*, 2019 *De novo*  
514 assembly of the goldfish (*Carassius auratus*) genome and the evolution of  
515 genes after whole-genome duplication. *Science Advances* 5 (6).
- 516 Clucas, G.V., L.A. Kerr, S.X. Cadrin, D.R. Zemeckis, G.D. Sherwood *et al.*, 2019a  
517 Adaptive genetic variation underlies biocomplexity of Atlantic Cod in the Gulf  
518 of Maine and on Georges Bank. *PLoS One* 14 (5).

- 519 Clucas, G.V., R.N. Lou, N.O. Therkildsen, and A.I. Kovach, 2019b Novel signals of  
520 adaptive genetic variation in northwestern Atlantic cod revealed by whole-  
521 genome sequencing. *Evolutionary Applications* 12 (10):1971-1987.
- 522 Dobin, A., C.A. Davis, F. Schlesinger, J. Drenkow, C. Zaleski *et al.*, 2013 STAR:  
523 ultrafast universal RNA-seq aligner. *Bioinformatics* 29 (1):15-21.
- 524 Drinkwater, K.F., 2005 The response of Atlantic cod (*Gadus morhua*) to future  
525 climate change. *Ices Journal of Marine Science* 62 (7):1327-1337.
- 526 Frydenberg, O., D. Moller, G. Naevdal, and K. Sick, 1965 Haemoglobin  
527 Polymorphism in Norwegian Cod Populations. *Hereditas-Genetiskt Arkiv* 53 (1-  
528 2):257.
- 529 Ghigliotti, L., S.E. Fevolden, C.H. Cheng, I. Babiak, A. Dettai *et al.*, 2012  
530 Karyotyping and cytogenetic mapping of Atlantic cod (*Gadus morhua*  
531 Linnaeus, 1758). *Animal Genetics* 43 (6):746-752.
- 532 Godo, O.R., and K. Michalsen, 2000 Migratory behaviour of north-east Arctic cod,  
533 studied by use of data storage tags. *Fisheries Research* 48 (2):127-140.
- 534 Haas, B.J., A. Papanicolaou, M. Yassour, M. Grabherr, P.D. Blood *et al.*, 2013 De  
535 novo transcript sequence reconstruction from RNA-seq using the Trinity  
536 platform for reference generation and analysis. *Nature Protocols* 8 (8):1494-  
537 1512.
- 538 Harris, R.S., 2007 Improved pairwise alignment of genomic DNA. The  
539 Pennsylvania State University.
- 540 Hemmer-Hansen, J., E.E. Nielsen, N.O. Therkildsen, M.I. Taylor, R. Ogden *et al.*,  
541 2013 A genomic island linked to ecotype divergence in Atlantic cod. *Molecular*  
542 *Ecology* 22 (10):2653-2667.
- 543 Hobson, V.J., D. Righton, J.D. Metcalfe, and G.C. Hays, 2007 Vertical movements of  
544 North Sea cod. *Marine Ecology Progress Series* 347:101-110.
- 545 Jain, M., S. Koren, K.H. Miga, J. Quick, A.C. Rand *et al.*, 2018 Nanopore sequencing  
546 and assembly of a human genome with ultra-long reads. *Nature Biotechnology*  
547 36 (4):338.
- 548 Jones, F.C., M.G. Grabherr, Y.F. Chan, P. Russell, E. Mauceli *et al.*, 2012 The  
549 genomic basis of adaptive evolution in threespine sticklebacks. *Nature* 484  
550 (7392):55-61.
- 551 Kadobianskyi, M., L. Schulze, M. Schuelke, and B. Judkewitz, 2019 Hybrid genome  
552 assembly and annotation of *Danio rerio*. *Scientific Data* 6.
- 553 Karlsen, B.O., K. Klingan, A. Emblem, T.E. Jorgensen, A. Jueterbock *et al.*, 2013  
554 Genomic divergence between the migratory and stationary ecotypes of  
555 Atlantic cod. *Molecular Ecology* 22 (20):5098-5111.

- 556 Kess, T., P. Bentzen, S.J. Lehnert, E.V.A. Sylvester, S. Lien *et al.*, 2019 A migration-  
557 associated supergene reveals loss of biocomplexity in Atlantic cod. *Science*  
558 *Advances* 5 (6):eaav2461.
- 559 Kirubakaran, T.G., H. Grove, M.P. Kent, S.R. Sandve, M. Baranski *et al.*, 2016 Two  
560 adjacent inversions maintain genomic differentiation between migratory and  
561 stationary ecotypes of Atlantic cod. *Molecular Ecology* 25 (10):2130-2143.
- 562 Knutsen, H., P.E. Jorde, J.A. Hutchings, J. Hemmer-Hansen, P. Gronkjaer *et al.*,  
563 2018 Stable coexistence of genetically divergent Atlantic cod ecotypes at  
564 multiple spatial scales. *Evolutionary Applications* 11 (9):1527-1539.
- 565 Melters, D.P., K.R. Bradnam, H.A. Young, N. Telis, M.R. May *et al.*, 2013  
566 Comparative analysis of tandem repeats from hundreds of species reveals  
567 unique insights into centromere evolution. *Genome Biology* 14 (1).
- 568 Mieszkowska, N., M.J. Genner, S.J. Hawkins, and D.W. Sims, 2009 Effects of  
569 climate change and commercial fishing on Atlantic Cod *Gadus Morhua*.  
570 *Advances in Marine Biology, Vol 56* 56:213-273.
- 571 Morris, D.J., J.K. Pinnegar, D.L. Maxwell, S.R. Dye, L.J. Fernand *et al.*, 2018 Over 10  
572 million seawater temperature records for the United Kingdom Continental  
573 Shelf between 1880 and 2014 from 17 Cefas (United Kingdom government)  
574 marine data systems. *Earth System Science Data* 10 (1):27-51.
- 575 Neat, F., and D. Righton, 2007 Warm water occupancy by North Sea cod.  
576 *Proceedings of the Royal Society B-Biological Sciences* 274 (1611):789-798.
- 577 Neat, F.C., V. Bendall, B. Berx, P.J. Wright, M.O. Cuaig *et al.*, 2014 Movement of  
578 Atlantic cod around the British Isles: implications for finer scale stock  
579 management. *Journal of Applied Ecology* 51 (6):1564-1574.
- 580 Pearse, D.E., N.J. Barson, T. Nome, G. Gao, M.A. Campbell *et al.*, 2018 Sex-  
581 dependent dominance maintains migration supergene in rainbow trout.  
582 *bioRxiv*.
- 583 Pertea, M., G.M. Pertea, C.M. Antonescu, T.C. Chang, J.T. Mendell *et al.*, 2015  
584 StringTie enables improved reconstruction of a transcriptome from RNA-seq  
585 reads. *Nature Biotechnology* 33 (3):290-295.
- 586 Pettersson, M.E., C.M. Rochus, F. Han, J. Chen, J. Hill *et al.*, 2019 A chromosome-  
587 level assembly of the Atlantic herring genome-detection of a supergene and  
588 other signals of selection. *Genome Research* 29 (11):1919-1928.
- 589 Puncher, G.N., S. Rowe, G.A. Rose, N.M. Leblanc, G.J. Parent *et al.*, 2019  
590 Chromosomal inversions in the Atlantic cod genome: Implications for  
591 management of Canada's Northern cod stock. *Fisheries Research* 216:29-40.
- 592 Rastas, P., L. Paulin, I. Hanski, R. Lehtonen, and P. Auvinen, 2013 Lep-MAP: fast  
593 and accurate linkage map construction for large SNP datasets. *Bioinformatics*  
594 29 (24):3128-3134.



- 595 Righton, D.A., K.H. Andersen, F. Neat, V. Thorsteinsson, P. Steingrund *et al.*, 2010  
596 Thermal niche of Atlantic cod *Gadus morhua*: limits, tolerance and optima.  
597 *Marine Ecology Progress Series* 420:1-U344.
- 598 Ruan, and Li, 2019 Fast and accurate long-read assembly with wtdbg2. *BioRxiv*.  
599 2019,doi:10.1101/530972.
- 600 Simao, F.A., R.M. Waterhouse, P. Ioannidis, E.V. Kriventseva, and E.M. Zdobnov,  
601 2015 BUSCO: assessing genome assembly and annotation completeness with  
602 single-copy orthologs. *Bioinformatics* 31 (19):3210-3212.
- 603 Sinclair-Waters, M., I.R. Bradbury, C.J. Morris, S. Lien, M.P. Kent *et al.*, 2017  
604 Ancient chromosomal rearrangement associated with local adaptation of a  
605 postglacially colonized population of Atlantic Cod in the northwest Atlantic.  
606 *Molecular Ecology* 27 (2):339-351.
- 607 Smit, A., R. Hubley, and P. Green, 1996 RepeatMasker. Open-3.0 in *Available at*  
608 <http://www.repeatmasker.org>.
- 609 Sodeland, M., P.E. Jorde, S. Lien, S. Jentoft, P.R. Berg *et al.*, 2016 "Islands of  
610 Divergence" in the Atlantic Cod genome represent polymorphic chromosomal  
611 rearrangements. *Genome Biology and Evolution* 8 (4):1012-1022.
- 612 Star, B., A.J. Nederbragt, S. Jentoft, U. Grimholt, M. Malmstrom *et al.*, 2011 The  
613 genome sequence of Atlantic cod reveals a unique immune system. *Nature* 477  
614 (7363):207-210.
- 615 Torresen, O.K., B. Star, S. Jentoft, W.B. Reinart, H. Grove *et al.*, 2017 An improved  
616 genome assembly uncovers prolific tandem repeats in Atlantic cod. *BMC*  
617 *Genomics* 18 (1):95.
- 618 Vaser, R., I. Sovic, N. Nagarajan, and M. Sikic, 2017 Fast and accurate de novo  
619 genome assembly from long uncorrected reads. *Genome Research* 27 (5):737-  
620 746.
- 621 Walker, B.J., T. Abeel, T. Shea, M. Priest, A. Abouelliel *et al.*, 2014 Pilon: An  
622 integrated tool for comprehensive microbial variant detection and genome  
623 assembly improvement. *PLoS One* 9 (11).
- 624 Wick, R.R., L.M. Judd, and K.E. Holt, 2018 Deepbinner: Demultiplexing barcoded  
625 Oxford Nanopore reads with deep convolutional neural networks. *PLoS*  
626 *Comput Biol* 14 (11):e1006583.
- 627 Wu, T.D., and C.K. Watanabe, 2005 GMAP: a genomic mapping and alignment  
628 program for mRNA and EST sequences. *Bioinformatics* 21 (9):1859-1875.  
629
